# Supplementary material for: Complete Utilization of the Major Carbon Sources Present in Sugar Beet Pulp Hydrolysates by the Oleaginous Red Yeasts Rhodotorula toruloides and R. mucilaginosa
Source: MDPI journal article supplement (doi:10.3390/jof7030215), 2021-03-17
Supplement: s1 [file s1]

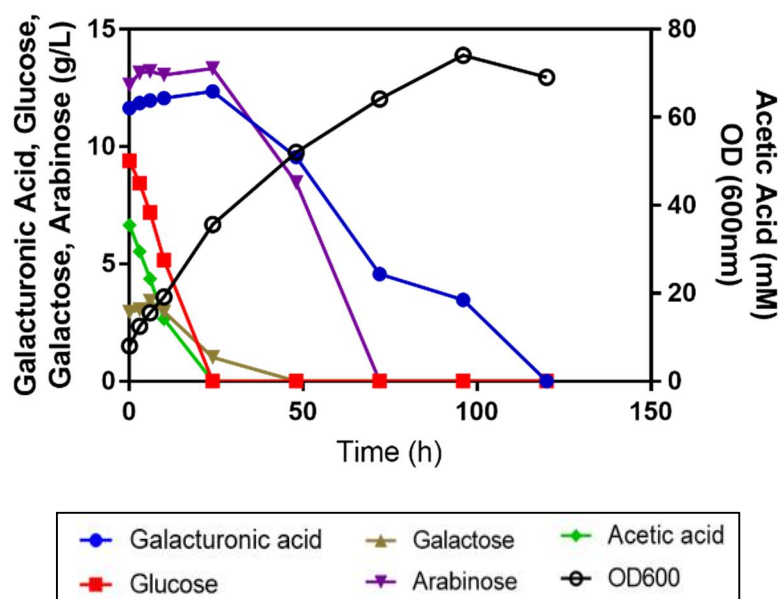

**Figure S1- Growth and sugars utilization profiles by *R. mucilaginosa* IST 390 cultivation in SBP hydrolysate H11 supplemented with commercial YNB containing 5 g/L of ammonium sulphate and amino acids (10 mg/L of L-histidine, 20 mg/L of DL-methionine and 20 mg/L DL-tryptophan). Medium was inoculated with an initial OD<sub>600nm</sub> of 8 and was carried out at 30°C, pH 5, with orbital agitation (250rpm).**

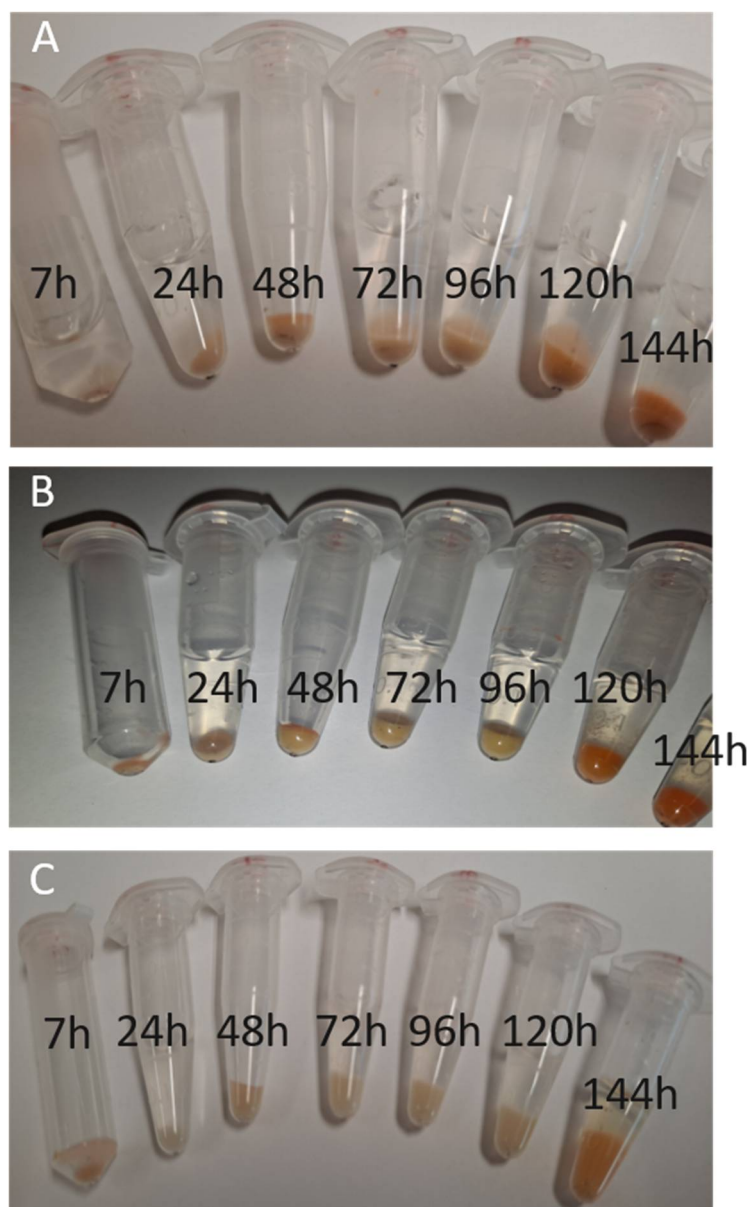

**Figure S2- Cell pellets of *Rhodotorula mucilaginosa* IST 390 (A), *R. toruloides* PYCC 5615 (B) and *R. toruloides* IFO 0880 (C) harvested during yeast bioconversion of sugar beet pulp hydrolysate H13. Samples were harvested from the cultures characterized in Figure 6.**
